# Supplementary material for: Impaired Effort Allocation in Patients with Recent-Onset Schizophrenia and Its Relevance to Negative Symptoms Assessments and Persistent Negative Symptoms
Source: MDPI journal article supplement (doi:10.3390/jcm11175060), 2022-08-28
Supplement: s1 [file s1]

Supplementary Files:

**Table S1.** Correlations of EEfRT difference measures with different negative symptoms scale scores

| Variables       | 88-12%<br>Probability Difference | High-Low<br>Difference | Reward |
|-----------------|----------------------------------|------------------------|--------|
| NS Total Scores |                                  |                        |        |
| BNSS Total      | -0.059                           | -0.192                 |        |
| SANS Total      | -0.145                           | -0.254                 |        |
| SNS-Total       | 0.025                            | 0.032                  |        |
| MAP subdomain   |                                  |                        |        |
| BNSS            | 0.011                            | -0.191                 |        |
| SANS            | -0.185                           | -0.332                 |        |
| SNS             | 0.057                            | 0.072                  |        |

BNSS, Brief Negative Symptoms Scale; EEfRT, Effort Expenditure for the Rewards Task; MAP, motivation and pleasure deficits; NS, negative symptoms; SANS, Scale for the Assessment of Negative Symptoms; SNS, Self-Evaluation of Negative Symptoms Scale.

**Table S2.** Correlations of EEfRT performance measures with other clinical measures

| Variables  | 88%    | 50%    | 12%    | High<br>Reward | Mid<br>Reward | Low<br>Reward |
|------------|--------|--------|--------|----------------|---------------|---------------|
| SAPS Total | -0.024 | -0.060 | 0.023  | 0.138          | -0.091        | -0.336        |
| CDSS       | 0.253  | -0.173 | -0.249 | -0.007         | 0.007         | -0.030        |
| ESRS       | -0.333 | -0.090 | -0.115 | -0.029         | -0.289        | -0.149        |

|                             |        |        |       |       |        |        |
|-----------------------------|--------|--------|-------|-------|--------|--------|
| Cognition (composite score) | 0.253  | 0.194  | 0.055 | 0.238 | 0.382* | 0.104  |
| PSP                         | 0.175  | 0.394* | 0.129 | 0.330 | 0.289  | -0.209 |
| OLZ equivalent doses,       | -0.202 | 0.052  | 0.175 | 0.034 | -0.229 | -0.223 |

---

\* Correlations were significant at the 0.05 level. CDSS, Calgary Depression Scale for Schizophrenia; EEfRT, Effort Expenditure for the Rewards Task; ESRS; Extrapyramidal Symptoms Rating Scale; OLZ, olanzapine; PSP, Personal and Social Performance Scale; SAPS, Scale for the Assessment of Positive Symptoms.
